# Supplementary material for: An Automated Blur Detection Method for Histological Whole Slide Imaging
Source: PubMed Central journal article supplement (PMC3862630; doi:10.1371/journal.pone.0082710), 2013-12-13
Supplement: pone.0082710.s001.pdf [file pone.0082710.s001.pdf]

| Set | DT-Algorithm | N     | N features in training | Features                               | B -> S | S -> B | Accuracy | Sensitivity | Rank | N nodes in tree | N tests in tree | Tree depth | N features in tree | Ignored features |
|-----|--------------|-------|------------------------|----------------------------------------|--------|--------|----------|-------------|------|-----------------|-----------------|------------|--------------------|------------------|
| HE  | Discr multi  | 16000 | 8                      | HC11, MGM, TG, NO, HE10, SDBD, SH, MBD | 116    | 115    | 0.9856   | 0.9855      | 1    | 27              | 13              | 6          | 8                  |                  |
| HE  | Discr uni    | 16000 | 8                      | HC11, MGM, TG, NO, HE10, SDBD, SH, MBD | 94     | 164    | 0.9839   | 0.9883      | 2    | 39              | 19              | 8          | 7 SH,              |                  |
| HE  | Gini         | 16000 | 8                      | HC11, MGM, TG, NO, HE10, SDBD, SH, MBD | 104    | 158    | 0.9836   | 0.9870      | 3    | 37              | 18              | 8          | 7 SDBD,            |                  |
| HE  | Discr multi  | 16000 | 6                      | HC11, MGM, TG, NO, HE10, SDBD          | 166    | 102    | 0.9833   | 0.9793      | 4    | 39              | 19              | 15         | 6                  |                  |
| HE  | Discr multi  | 16000 | 7                      | HC11, MGM, TG, NO, HE10, SDBD, SH      | 170    | 105    | 0.9828   | 0.9788      | 5    | 35              | 17              | 13         | 7                  |                  |
| HE  | Discr uni    | 16000 | 7                      | HC11, MGM, TG, NO, HE10, SDBD, SH      | 104    | 174    | 0.9826   | 0.9870      | 6    | 39              | 19              | 8          | 6 SH               |                  |
| HE  | Discr uni    | 16000 | 6                      | HC11, MGM, TG, NO, HE10, SDBD          | 104    | 174    | 0.9826   | 0.9870      | 6    | 39              | 19              | 8          | 6                  |                  |
| HE  | Gini         | 16000 | 6                      | HC11, MGM, TG, NO, HE10, SDBD          | 114    | 171    | 0.9822   | 0.9858      | 8    | 35              | 17              | 6          | 6                  |                  |
| HE  | Gini         | 16000 | 7                      | HC11, MGM, TG, NO, HE10, SDBD, SH      | 117    | 169    | 0.9821   | 0.9854      | 9    | 37              | 18              | 7          | 7                  |                  |
| HE  | Gini         | 16000 | 5                      | HC11, MGM, TG, NO, HE10                | 115    | 188    | 0.9811   | 0.9856      | 10   | 23              | 11              | 6          | 5                  |                  |
| HE  | Discr multi  | 16000 | 5                      | HC11, MGM, TG, NO, HE10                | 141    | 177    | 0.9801   | 0.9824      | 11   |                 |                 |            |                    |                  |
| HE  | Discr uni    | 16000 | 5                      | HC11, MGM, TG, NO, HE10                | 123    | 214    | 0.9789   | 0.9846      | 12   |                 |                 |            |                    |                  |
| HE  | Discr multi  | 16000 | 4                      | HC11, MGM, TG, NO                      | 175    | 171    | 0.9784   | 0.9781      | 13   |                 |                 |            |                    |                  |
| HE  | Gini         | 16000 | 4                      | HC11, MGM, TG, NO                      | 154    | 197    | 0.9781   | 0.9808      | 14   |                 |                 |            |                    |                  |
| HE  | Discr uni    | 16000 | 4                      | HC11, MGM, TG, NO                      | 119    | 233    | 0.9780   | 0.9851      | 15   |                 |                 |            |                    |                  |
| HE  | Discr multi  | 16000 | 3                      | HC11, MGM, TG                          | 197    | 163    | 0.9775   | 0.9754      | 16   |                 |                 |            |                    |                  |
| HE  | Discr uni    | 16000 | 3                      | HC11, MGM, TG                          | 154    | 227    | 0.9762   | 0.9808      | 17   |                 |                 |            |                    |                  |
| HE  | Gini         | 16000 | 3                      | HC11, MGM, TG                          | 167    | 254    | 0.9737   | 0.9791      | 18   |                 |                 |            |                    |                  |
| HE  | Discr multi  | 16000 | 2                      | HC11, MGM                              | 213    | 236    | 0.9719   | 0.9734      | 19   |                 |                 |            |                    |                  |
| HE  | Discr uni    | 16000 | 2                      | HC11, MGM                              | 209    | 256    | 0.9709   | 0.9739      | 20   |                 |                 |            |                    |                  |
| HE  | Gini         | 16000 | 2                      | HC11, MGM                              | 186    | 287    | 0.9704   | 0.9768      | 21   |                 |                 |            |                    |                  |
| HE  | Discr uni    | 16000 | 1                      | HC11                                   | 319    | 193    | 0.9680   | 0.9601      | 22   |                 |                 |            |                    |                  |
| HE  | Discr multi  | 16000 | 1                      | HC11                                   | 319    | 193    | 0.9680   | 0.9601      | 22   |                 |                 |            |                    |                  |
| HE  | Gini         | 16000 | 1                      | HC11                                   | 290    | 224    | 0.9679   | 0.9638      | 24   |                 |                 |            |                    |                  |
| HE  | Discr uni    | 16000 | 1                      | MGM                                    | 288    | 483    | 0.9518   | 0.9640      | 25   |                 |                 |            |                    |                  |
| HE  | Discr multi  | 16000 | 1                      | MGM                                    | 288    | 483    | 0.9518   | 0.9640      | 25   |                 |                 |            |                    |                  |
| HE  | Gini         | 16000 | 1                      | MGM                                    | 267    | 511    | 0.9514   | 0.9666      | 27   |                 |                 |            |                    |                  |
| NS  | Discr multi  | 16000 | 8                      | HC11, MGM, TG, NO, HE10, SDBD, SH, MBD | 285    | 246    | 0.9668   | 0.9644      | 1    | 21              | 10              | 7          | 8                  |                  |
| NS  | Discr multi  | 16000 | 6                      | HC11, MGM, TG, NO, HE10, SDBD          | 324    | 292    | 0.9615   | 0.9595      | 2    |                 |                 |            |                    |                  |
| NS  | Discr multi  | 16000 | 7                      | HC11, MGM, TG, NO, HE10, SDBD, SH      | 350    | 268    | 0.9614   | 0.9563      | 3    |                 |                 |            |                    |                  |
| NS  | Discr multi  | 16000 | 5                      | HC11, MGM, TG, NO, HE10                | 333    | 292    | 0.9609   | 0.9584      | 4    |                 |                 |            |                    |                  |
| NS  | Gini         | 16000 | 8                      | HC11, MGM, TG, NO, HE10, SDBD, SH, MBD | 321    | 330    | 0.9593   | 0.9599      | 5    |                 |                 |            |                    |                  |
| NS  | Gini         | 16000 | 7                      | HC11, MGM, TG, NO, HE10, SDBD, SH      | 315    | 348    | 0.9586   | 0.9606      | 6    |                 |                 |            |                    |                  |
| NS  | Discr uni    | 16000 | 8                      | HC11, MGM, TG, NO, HE10, SDBD, SH, MBD | 390    | 282    | 0.9580   | 0.9513      | 7    |                 |                 |            |                    |                  |
| NS  | Discr multi  | 16000 | 4                      | HC11, MGM, TG, NO                      | 359    | 318    | 0.9577   | 0.9551      | 8    |                 |                 |            |                    |                  |
| NS  | Discr uni    | 16000 | 7                      | HC11, MGM, TG, NO, HE10, SDBD, SH      | 414    | 270    | 0.9573   | 0.9483      | 9    |                 |                 |            |                    |                  |
| NS  | Discr multi  | 16000 | 3                      | HC11, MGM, TG                          | 397    | 290    | 0.9571   | 0.9504      | 10   |                 |                 |            |                    |                  |
| NS  | Discr uni    | 16000 | 4                      | HC11, MGM, TG, NO                      | 382    | 308    | 0.9569   | 0.9523      | 11   |                 |                 |            |                    |                  |
| NS  | Discr uni    | 16000 | 3                      | HC11, MGM, TG                          | 376    | 317    | 0.9567   | 0.9530      | 12   |                 |                 |            |                    |                  |
| NS  | Discr uni    | 16000 | 2                      | HC11, MGM                              | 376    | 317    | 0.9567   | 0.9530      | 12   |                 |                 |            |                    |                  |
| NS  | Discr multi  | 16000 | 2                      | HC11, MGM                              | 393    | 316    | 0.9557   | 0.9509      | 14   |                 |                 |            |                    |                  |
| NS  | Gini         | 16000 | 6                      | HC11, MGM, TG, NO, HE10, SDBD          | 318    | 399    | 0.9552   | 0.9603      | 15   |                 |                 |            |                    |                  |
| NS  | Discr uni    | 16000 | 6                      | HC11, MGM, TG, NO, HE10, SDBD          | 441    | 280    | 0.9549   | 0.9449      | 16   |                 |                 |            |                    |                  |
| NS  | Discr uni    | 16000 | 5                      | HC11, MGM, TG, NO, HE10                | 427    | 297    | 0.9548   | 0.9466      | 17   |                 |                 |            |                    |                  |
| NS  | Gini         | 16000 | 4                      | HC11, MGM, TG, NO                      | 346    | 385    | 0.9543   | 0.9568      | 18   |                 |                 |            |                    |                  |
| NS  | Gini         | 16000 | 5                      | HC11, MGM, TG, NO, HE10                | 347    | 385    | 0.9543   | 0.9566      | 19   |                 |                 |            |                    |                  |
| NS  | Gini         | 16000 | 3                      | HC11, MGM, TG                          | 354    | 384    | 0.9539   | 0.9558      | 20   |                 |                 |            |                    |                  |
| NS  | Gini         | 16000 | 2                      | HC11, MGM                              | 350    | 391    | 0.9537   | 0.9563      | 21   |                 |                 |            |                    |                  |
| NS  | Discr uni    | 16000 | 1                      | HC11                                   | 465    | 286    | 0.9531   | 0.9419      | 22   |                 |                 |            |                    |                  |
| NS  | Discr multi  | 16000 | 1                      | HC11                                   | 465    | 286    | 0.9531   | 0.9419      | 22   |                 |                 |            |                    |                  |
| NS  | Gini         | 16000 | 1                      | HC11                                   | 394    | 361    | 0.9528   | 0.9508      | 24   |                 |                 |            |                    |                  |
| NS  | Discr uni    | 16000 | 1                      | MGM                                    | 528    | 621    | 0.9282   | 0.9340      | 25   |                 |                 |            |                    |                  |
| NS  | Discr multi  | 16000 | 1                      | MGM                                    | 528    | 621    | 0.9282   | 0.9340      | 25   |                 |                 |            |                    |                  |
| NS  | Gini         | 16000 | 1                      | MGM                                    | 521    | 648    | 0.9269   | 0.9349      | 27   |                 |                 |            |                    |                  |
| CS  | Discr multi  | 16000 | 8                      | HC11, MGM, TG, NO, HE10, SDBD, SH, MBD | 149    | 216    | 0.9772   | 0.9814      | 1    | 21              | 10              | 7          | 8                  |                  |
| CS  | Gini         | 16000 | 8                      | HC11, MGM, TG, NO, HE10, SDBD, SH, MBD | 149    | 230    | 0.9763   | 0.9814      | 2    | 25              | 12              | 6          | 6 SDBD, MBD        |                  |
| CS  | Gini         | 16000 | 7                      | HC11, MGM, TG, NO, HE10, SDBD, SH      | 180    | 207    | 0.9758   | 0.9775      | 3    | 25              | 12              | 6          | 6 SDBD             |                  |
| CS  | Discr uni    | 16000 | 6                      | HC11, MGM, TG, NO, HE10, SDBD          | 231    | 176    | 0.9746   | 0.9711      | 4    | 33              | 16              | 7          | 6                  |                  |
| CS  | Discr uni    | 16000 | 8                      | HC11, MGM, TG, NO, HE10, SDBD, SH, MBD | 221    | 187    | 0.9745   | 0.9724      | 5    | 33              | 16              | 6          | 7 SH               |                  |
| CS  | Discr uni    | 16000 | 7                      | HC11, MGM, TG, NO, HE10, SDBD, SH      | 221    | 187    | 0.9745   | 0.9724      | 5    | 33              | 16              | 7          | 6 SH               |                  |
| CS  | Gini         | 16000 | 6                      | HC11, MGM, TG, NO, HE10, SDBD          | 176    | 235    | 0.9743   | 0.9780      | 7    | 25              | 12              | 6          | 6                  |                  |
| CS  | Discr multi  | 16000 | 7                      | HC11, MGM, TG, NO, HE10, SDBD, SH      | 197    | 221    | 0.9739   | 0.9754      | 8    | 17              | 8               | 5          | 7                  |                  |
| CS  | Discr multi  | 16000 | 6                      | HC11, MGM, TG, NO, HE10, SDBD          | 201    | 220    | 0.9737   | 0.9749      | 9    | 17              | 8               | 5          | 6                  |                  |
| CS  | Gini         | 16000 | 5                      | HC11, MGM, TG, NO, HE10                | 178    | 245    | 0.9736   | 0.9778      | 10   | 21              | 10              | 5          | 5                  |                  |
| CS  | Gini         | 16000 | 4                      | HC11, MGM, TG, NO                      | 177    | 248    | 0.9734   | 0.9779      | 11   | 15              | 7               | 4          | 4                  |                  |
| CS  | Discr uni    | 16000 | 5                      | HC11, MGM, TG, NO, HE10                | 206    | 261    | 0.9708   | 0.9743      | 12   |                 |                 |            |                    |                  |
| CS  | Discr uni    | 16000 | 4                      | HC11, MGM, TG, NO                      | 198    | 274    | 0.9705   | 0.9753      | 13   |                 |                 |            |                    |                  |
| CS  | Discr multi  | 16000 | 5                      | HC11, MGM, TG, NO, HE10                | 220    | 256    | 0.9703   | 0.9725      | 14   |                 |                 |            |                    |                  |
| CS  | Discr multi  | 16000 | 3                      | HC11, MGM, TG                          | 216    | 284    | 0.9688   | 0.9730      | 15   |                 |                 |            |                    |                  |
| CS  | Gini         | 16000 | 3                      | HC11, MGM, TG                          | 279    | 225    | 0.9685   | 0.9651      | 16   |                 |                 |            |                    |                  |
| CS  | Discr multi  | 16000 | 4                      | HC11, MGM, TG, NO                      | 268    | 243    | 0.9681   | 0.9665      | 17   |                 |                 |            |                    |                  |
| CS  | Discr multi  | 16000 | 2                      | HC11, MGM                              | 174    | 346    | 0.9675   | 0.9783      | 18   |                 |                 |            |                    |                  |
| CS  | Discr uni    | 16000 | 3                      | HC11, MGM, TG                          | 253    | 277    | 0.9669   | 0.9684      | 19   |                 |                 |            |                    |                  |
| CS  | Gini         | 16000 | 2                      | HC11, MGM                              | 236    | 311    | 0.9658   | 0.9705      | 20   |                 |                 |            |                    |                  |
| CS  | Discr uni    | 16000 | 2                      | HC11, MGM                              | 286    | 273    | 0.9651   | 0.9643      | 21   |                 |                 |            |                    |                  |
| CS  | Gini         | 16000 | 1                      | HC11                                   | 208    | 361    | 0.9644   | 0.9740      | 22   |                 |                 |            |                    |                  |
| CS  | Discr uni    | 16000 | 1                      | HC11                                   | 315    | 275    | 0.9631   | 0.9606      | 23   |                 |                 |            |                    |                  |
| CS  | Discr multi  | 16000 | 1                      | HC11                                   | 315    | 275    | 0.9631   | 0.9606      | 23   |                 |                 |            |                    |                  |
| CS  | Discr uni    | 16000 | 1                      | MGM                                    | 382    | 442    | 0.9485   | 0.9523      | 25   |                 |                 |            |                    |                  |
| CS  | Discr multi  | 16000 | 1                      | MGM                                    | 382    | 442    | 0.9485   | 0.9523      | 25   |                 |                 |            |                    |                  |
| CS  | Gini         | 16000 | 1                      | MGM                                    | 347    | 482    | 0.9482   | 0.9566      | 27   |                 |                 |            |                    |                  |
| IHC | Gini         | 32000 | 7                      | HC11, MGM, TG, NO, HE10, SDBD, SH      | 511    | 564    | 0.9664   | 0.9681      | 1    | 39              | 19              | 8          | 6 NO               |                  |
| IHC | Gini         | 32000 | 8                      | HC11, MGM, TG, NO, HE10, SDBD, SH, MBD | 557    | 523    | 0.9663   | 0.9652      | 2    | 39              | 19              | 8          | 7 NO               |                  |
| IHC | Gini         | 32000 | 6                      | HC11, MGM, TG, NO, HE10, SDBD          | 529    | 560    | 0.9660   | 0.9669      | 3    | 43              | 21              | 9          | 6                  |                  |

|     |              |       |                                          |     |      |        |        |    |  |    |    |   |   |
|-----|--------------|-------|------------------------------------------|-----|------|--------|--------|----|--|----|----|---|---|
| IHC | Discri multi | 32000 | 8 HC11, MGM, TG, NO, HE10, SDBD, SH, MBD | 559 | 539  | 0.9657 | 0.9651 | 4  |  |    |    |   |   |
| IHC | Gini         | 32000 | 4 HC11, MGM, TG, NO                      | 549 | 550  | 0.9657 | 0.9657 | 5  |  | 31 | 15 | 5 | 8 |
| IHC | Discri multi | 32000 | 7 HC11, MGM, TG, NO, HE10, SDBD, SH      | 553 | 559  | 0.9653 | 0.9654 | 6  |  | 23 | 11 | 8 | 4 |
| IHC | Discri multi | 32000 | 6 HC11, MGM, TG, NO, HE10, SDBD          | 587 | 525  | 0.9653 | 0.9633 | 6  |  | 31 | 15 | 7 | 7 |
| IHC | Gini         | 32000 | 5 HC11, MGM, TG, NO, HE10                | 572 | 556  | 0.9648 | 0.9643 | 8  |  | 25 | 12 | 5 | 6 |
| IHC | Gini         | 32000 | 3 HC11, MGM, TG                          | 567 | 592  | 0.9638 | 0.9646 | 9  |  | 19 | 9  | 6 | 5 |
| IHC | Discri multi | 32000 | 5 HC11, MGM, TG, NO, HE10                | 569 | 619  | 0.9629 | 0.9644 | 10 |  | 17 | 8  | 6 | 3 |
| IHC | Discri multi | 32000 | 4 HC11, MGM, TG, NO                      | 538 | 654  | 0.9628 | 0.9664 | 11 |  | 11 | 5  | 3 | 5 |
| IHC | Discri multi | 32000 | 3 HC11, MGM, TG                          | 505 | 698  | 0.9624 | 0.9684 | 12 |  | 17 | 8  | 4 | 4 |
| IHC | Discri uni   | 32000 | 3 HC11, MGM, TG                          | 685 | 576  | 0.9606 | 0.9572 | 13 |  | 13 | 6  | 4 | 3 |
| IHC | Discri multi | 32000 | 2 HC11, MGM                              | 575 | 693  | 0.9604 | 0.9641 | 14 |  |    |    |   |   |
| IHC | Discri uni   | 32000 | 2 HC11, MGM                              | 639 | 661  | 0.9594 | 0.9601 | 15 |  |    |    |   |   |
| IHC | Discri uni   | 32000 | 8 HC11, MGM, TG, NO, HE10, SDBD, SH, MBD | 672 | 634  | 0.9592 | 0.9580 | 16 |  |    |    |   |   |
| IHC | Discri uni   | 32000 | 7 HC11, MGM, TG, NO, HE10, SDBD, SH      | 672 | 634  | 0.9592 | 0.9580 | 16 |  |    |    |   |   |
| IHC | Discri uni   | 32000 | 5 HC11, MGM, TG, NO, HE10                | 665 | 647  | 0.9590 | 0.9584 | 18 |  |    |    |   |   |
| IHC | Gini         | 32000 | 2 HC11, MGM                              | 684 | 628  | 0.9590 | 0.9573 | 18 |  |    |    |   |   |
| IHC | Discri uni   | 32000 | 6 HC11, MGM, TG, NO, HE10, SDBD          | 709 | 615  | 0.9586 | 0.9557 | 20 |  |    |    |   |   |
| IHC | Discri uni   | 32000 | 4 HC11, MGM, TG, NO                      | 709 | 615  | 0.9586 | 0.9557 | 20 |  |    |    |   |   |
| IHC | Discri uni   | 32000 | 1 HC11                                   | 771 | 574  | 0.9580 | 0.9518 | 22 |  |    |    |   |   |
| IHC | Discri multi | 32000 | 1 HC11                                   | 771 | 574  | 0.9580 | 0.9518 | 22 |  |    |    |   |   |
| IHC | Gini         | 32000 | 1 HC11                                   | 641 | 717  | 0.9576 | 0.9599 | 24 |  |    |    |   |   |
| IHC | Discri uni   | 32000 | 1 MGM                                    | 901 | 1064 | 0.9386 | 0.9437 | 25 |  |    |    |   |   |
| IHC | Discri multi | 32000 | 1 MGM                                    | 901 | 1064 | 0.9386 | 0.9437 | 25 |  |    |    |   |   |
| IHC | Gini         | 32000 | 1 MGM                                    | 902 | 1077 | 0.9382 | 0.9436 | 27 |  |    |    |   |   |

|     |              |       |                                          |      |      |        |        |    |  |    |    |    |        |
|-----|--------------|-------|------------------------------------------|------|------|--------|--------|----|--|----|----|----|--------|
| ALL | Gini         | 48000 | 8 HC11, MGM, TG, NO, HE10, SDBD, SH, MBD | 942  | 781  | 0.9641 | 0.9608 | 1  |  | 45 | 22 | 8  | 7 HE10 |
| ALL | Discri multi | 48000 | 8 HC11, MGM, TG, NO, HE10, SDBD, SH, MBD | 986  | 757  | 0.9637 | 0.9589 | 2  |  | 57 | 28 | 13 | 8      |
| ALL | Discri multi | 48000 | 7 HC11, MGM, TG, NO, HE10, SDBD, SH      | 1094 | 694  | 0.9628 | 0.9544 | 3  |  | 51 | 25 | 9  | 7      |
| ALL | Gini         | 48000 | 7 HC11, MGM, TG, NO, HE10, SDBD, SH      | 1000 | 797  | 0.9626 | 0.9583 | 4  |  | 51 | 25 | 8  | 7      |
| ALL | Discri uni   | 48000 | 8 HC11, MGM, TG, NO, HE10, SDBD, SH, MBD | 830  | 1015 | 0.9616 | 0.9654 | 5  |  | 43 | 21 | 9  | 7 HE10 |
| ALL | Gini         | 48000 | 6 HC11, MGM, TG, NO, HE10, SDBD          | 1026 | 824  | 0.9615 | 0.9573 | 6  |  | 47 | 23 | 8  | 6      |
| ALL | Discri uni   | 48000 | 7 HC11, MGM, TG, NO, HE10, SDBD, SH      | 917  | 939  | 0.9613 | 0.9618 | 7  |  | 69 | 34 | 11 | 6 HE10 |
| ALL | Discri multi | 48000 | 6 HC11, MGM, TG, NO, HE10, SDBD          | 1095 | 789  | 0.9608 | 0.9544 | 8  |  | 33 | 16 | 8  | 6      |
| ALL | Discri uni   | 48000 | 6 HC11, MGM, TG, NO, HE10, SDBD          | 981  | 904  | 0.9607 | 0.9591 | 9  |  | 59 | 29 | 12 | 5 HE10 |
| ALL | Gini         | 48000 | 5 HC11, MGM, TG, NO, HE10                | 856  | 1073 | 0.9598 | 0.9643 | 10 |  | 27 | 13 | 6  | 5      |
| ALL | Gini         | 48000 | 4 HC11, MGM, TG, NO                      | 927  | 1006 | 0.9597 | 0.9614 | 11 |  | 31 | 16 | 7  | 4      |
| ALL | Discri uni   | 48000 | 5 HC11, MGM, TG, NO, HE10                | 974  | 1020 | 0.9585 | 0.9594 | 12 |  |    |    |    |        |
| ALL | Discri uni   | 48000 | 4 HC11, MGM, TG, NO                      | 976  | 1018 | 0.9585 | 0.9593 | 12 |  |    |    |    |        |
| ALL | Discri multi | 48000 | 5 HC11, MGM, TG, NO, HE10                | 1006 | 1006 | 0.9581 | 0.9581 | 14 |  |    |    |    |        |
| ALL | Discri multi | 48000 | 4 HC11, MGM, TG, NO                      | 929  | 1127 | 0.9572 | 0.9613 | 15 |  |    |    |    |        |
| ALL | Gini         | 48000 | 3 HC11, MGM, TG                          | 963  | 1141 | 0.9562 | 0.9599 | 16 |  |    |    |    |        |
| ALL | Discri multi | 48000 | 3 HC11, MGM, TG                          | 869  | 1242 | 0.9560 | 0.9638 | 17 |  |    |    |    |        |
| ALL | Discri uni   | 48000 | 3 HC11, MGM, TG                          | 1050 | 1069 | 0.9559 | 0.9563 | 18 |  |    |    |    |        |
| ALL | Discri multi | 48000 | 2 HC11, MGM                              | 986  | 1160 | 0.9553 | 0.9589 | 19 |  |    |    |    |        |
| ALL | Discri uni   | 48000 | 2 HC11, MGM                              | 1015 | 1150 | 0.9549 | 0.9577 | 20 |  |    |    |    |        |
| ALL | Gini         | 48000 | 2 HC11, MGM                              | 988  | 1188 | 0.9547 | 0.9588 | 21 |  |    |    |    |        |
| ALL | Discri uni   | 48000 | 1 HC11                                   | 1023 | 1163 | 0.9545 | 0.9574 | 22 |  |    |    |    |        |
| ALL | Discri multi | 48000 | 1 HC11                                   | 1023 | 1163 | 0.9545 | 0.9574 | 22 |  |    |    |    |        |
| ALL | Gini         | 48000 | 1 HC11                                   | 988  | 1205 | 0.9543 | 0.9588 | 24 |  |    |    |    |        |
| ALL | Gini         | 48000 | 1 MGM                                    | 1814 | 1387 | 0.9333 | 0.9244 | 25 |  |    |    |    |        |
| ALL | Discri uni   | 48000 | 1 MGM                                    | 1588 | 1635 | 0.9329 | 0.9338 | 26 |  |    |    |    |        |
| ALL | Discri multi | 48000 | 1 MGM                                    | 1588 | 1635 | 0.9329 | 0.9338 | 26 |  |    |    |    |        |
